# Supplementary material
Source: HighWire-hosted journal article supplement (http://www.cmajopen.ca/highwire/filestream/81306/field_highwire_adjunct_files/1/2019-0215-COREQ-checklist.pdf)
Supplement: 2019-0215-COREQ-checklist.pdf [file 2019-0215-COREQ-checklist.pdf]

**“The impact of Canada’s fragmented healthcare model on pertussis vaccination in pregnancy: A qualitative study of perinatal healthcare providers”**

**Consolidated criteria for reporting qualitative studies (COREQ): 32-item checklist**

| No. Item                                       | Guide questions/description                                                                                                                     | Reported in                                                                                           |
|------------------------------------------------|-------------------------------------------------------------------------------------------------------------------------------------------------|-------------------------------------------------------------------------------------------------------|
| <b>Domain 1: Research team and reflexivity</b> |                                                                                                                                                 |                                                                                                       |
| <i>Personal Characteristics</i>                |                                                                                                                                                 |                                                                                                       |
| 1. Inter viewer/facilitator                    | Which author/s conducted the inter view or focus group?                                                                                         | Methods, Page 3                                                                                       |
| 2. Credentials                                 | What were the researcher’s credentials? E.g. PhD, MD                                                                                            | Methods, Page 3 + Information to the journal provided in the Title Page                               |
| 3. Occupation                                  | What was their occupation at the time of the study?                                                                                             | Methods, Page 3                                                                                       |
| 4. Gender/Sex                                  | Was the researcher(s) gender identity reported?<br><i>We rephrased this from original COREQ to move away from “male” or “female” dichotomy.</i> | Methods, Page 3                                                                                       |
| 5. Experience and training                     | What experience or training did the researcher have?                                                                                            | Methods, Page 3                                                                                       |
| <i>Relationship with participants</i>          |                                                                                                                                                 |                                                                                                       |
| 6. Relationship established                    | Was a relationship established prior to study commencement?                                                                                     | Methods, Page 2-3<br>This is not specifically stated but we describe how participants were recruited. |
| 7. Participant knowledge of the interviewer    | What did the participants know about the researcher? e.g. personal goals, reasons for doing the research                                        | Methods, Page 2-3<br>This is not specifically stated but we describe how participants were recruited. |
| 8. Interviewer characteristics                 | What characteristics were reported about the inter viewer/facilitator? e.g. Bias, assumptions, reasons and interests in the research topic      | Funding statement: researchers/interviewers are part of the Canadian Immunization Research Network    |

|                                          |                                                                                                                                                          |                                       |
|------------------------------------------|----------------------------------------------------------------------------------------------------------------------------------------------------------|---------------------------------------|
| <b>Domain 2: study design</b>            |                                                                                                                                                          |                                       |
| <i>Theoretical framework</i>             |                                                                                                                                                          |                                       |
| 9. Methodological orientation and Theory | What methodological orientation was stated to underpin the study? e.g. grounded theory, discourse analysis, ethnography, phenomenology, content analysis | Methods, Page 4                       |
| <i>Participant selection</i>             |                                                                                                                                                          |                                       |
| 10. Sampling                             | How were participants selected? e.g. purposive, convenience, consecutive, snowball                                                                       | Methods, Page 2                       |
| 11. Method of approach                   | How were participants approached? e.g. face-to-face, telephone, mail, email                                                                              | Methods, Page 2                       |
| 12. Sample size                          | How many participants were in the study?                                                                                                                 | Results, Page 4                       |
| 13. Non-participation                    | How many people refused to participate or dropped out? Reasons?                                                                                          | Methods, Page 4                       |
| <i>Setting</i>                           |                                                                                                                                                          |                                       |
| 14. Setting of data collection           | Where was the data collected? e.g. home, clinic, workplace                                                                                               | Methods, Page 3                       |
| 15. Presence of non-participants         | Was anyone else present besides the participants and researchers?                                                                                        | Not reported, inferred in the methods |
| 16. Description of sample                | What are the important characteristics of the sample? e.g. demographic data, date                                                                        | Table 1                               |
| <i>Data collection</i>                   |                                                                                                                                                          |                                       |
| 17. Interview guide                      | Were questions, prompts, guides provided by the authors? Was it pilot tested?                                                                            | Methods, Page 3                       |
| 18. Repeat interviews                    | Were repeat inter views carried out? If yes, how many?                                                                                                   | Not reported, inferred in the methods |
| 19. Audio/visual recording               | Did the research use audio or visual recording to collect the data?                                                                                      | Methods, Page 3                       |
| 20. Field notes                          | Were field notes made during and/or after the inter view or focus group?                                                                                 | Not reported                          |
| 21. Duration                             | What was the duration of the inter views or focus group?                                                                                                 | Methods, Page 3                       |
| 22. Data saturation                      | Was data saturation discussed?<br><i>We aimed for data sufficiency and recruitment was</i>                                                               | Methods, Page 2-3                     |

|                                        |                                                                                                                                                     |                                                                             |
|----------------------------------------|-----------------------------------------------------------------------------------------------------------------------------------------------------|-----------------------------------------------------------------------------|
|                                        | <i>stopped when were no longer identifying new themes in the interviews, and were no longer adding meaningful diversity to the study population</i> |                                                                             |
| 23. Transcripts returned               | Were transcripts returned to participants for comment and/or correction?                                                                            | Methods, Page 3                                                             |
| <b>Domain 3: analysis and findings</b> |                                                                                                                                                     |                                                                             |
| <i>Data analysis</i>                   |                                                                                                                                                     |                                                                             |
| 24. Number of data coders              | How many data coders coded the data?                                                                                                                | Methods Page 4                                                              |
| 25. Description of the coding tree     | Did authors provide a description of the coding tree?                                                                                               | Methods, Page 4 – no, but we provided rationale for how the coding was done |
| 26. Derivation of themes               | Were themes identified in advance or derived from the data?                                                                                         | Methods, Page 4                                                             |
| 27. Software                           | What software, if applicable, was used to manage the data?                                                                                          | Methods, Page 4                                                             |
| 28. Participant checking               | Did participants provide feedback on the findings?                                                                                                  | Methods, Page 4                                                             |
| <i>Reporting</i>                       |                                                                                                                                                     |                                                                             |
| 29. Quotations presented               | Were participant quotations presented to illustrate the themes/findings? Was each quotation identified? e.g. participant number                     | Results Box 1-4                                                             |
| 30. Data and findings consistent       | Was there consistency between the data and the findings presented?                                                                                  | Results Page 4-7                                                            |
| 31. Clarity of major themes            | Were major themes clearly presented in the findings?                                                                                                | Results Page 4-7, Boxes 1-4                                                 |
| 32. Clarity of minor themes            | Is there a description of diverse cases or discussion of minor themes?                                                                              | Results, Page 4-7                                                           |
